# Supplementary material for: Poly-Tobacco Use among High School Students
Source: MDPI journal article supplement (doi:10.3390/ijerph121114477), 2015-11-13
Supplement: s1 [file s1]

## Poly-Tobacco Use among High School Students

**Table S1.** Questions Regarding Beliefs towards Tobacco Companies and Tobacco Products in the 2013 North Carolina Youth Tobacco Survey.

| Question                                                                                          | Responses                                                                                                                                              |
|---------------------------------------------------------------------------------------------------|--------------------------------------------------------------------------------------------------------------------------------------------------------|
| Do you believe that tobacco companies try to get young people under 18 to use tobacco products?   | A. Yes<br>B. No                                                                                                                                        |
| Do you think that breathing smoke from other people's cigarettes or other tobacco products is...? | A. Very harmful to one's health<br>B. Somewhat harmful to one's health<br>C. Not very harmful to one's health<br>D. Not harmful at all to one's health |
| Do you think smoking cigarettes makes young people look cool or fit in?                           | A. Definitely yes<br>B. Probably yes<br>C. Probably not<br>D. Definitely not                                                                           |
| Do you think young people who smoke cigarettes have more friends?                                 | A. Definitely yes<br>B. Probably yes<br>C. Probably not<br>D. Definitely not                                                                           |
| How strongly do you agree with the statement "All tobacco products are dangerous"?                | A. Strongly agree<br>B. Agree<br>C. Disagree<br>D. Strongly disagree                                                                                   |
| Do you think you will smoke a cigarette in the next year?                                         | A. Definitely yes<br>B. Probably yes<br>C. Probably not<br>D. Definitely not                                                                           |
| If one of your best friends were to offer you a cigarette, would you smoke it?                    | A. Definitely yes<br>B. Probably yes<br>C. Probably not<br>D. Definitely not                                                                           |
